# Supplementary material for: Quality assessment of long read data in multisample lrRNA-seq experiments using SQANTI-reads
Source: HighWire-hosted journal article supplement (doi:10.1101/gr.280021.124), 2025-03-03
Supplement: Supplemental_Material.pdf [file Supplemental_Material.pdf]

# Table of Contents

|                                   |         |
|-----------------------------------|---------|
| 1. Supplementary Figure 1 .....   | Page 2  |
| 2. Supplementary Figure 2 .....   | Page 3  |
| 3. Supplementary Figure 3 .....   | Page 4  |
| 4. Supplementary Figure 4 .....   | Page 5  |
| 5. Supplementary Figure 5 .....   | Page 6  |
| 6. Supplementary Figure 6 .....   | Page 7  |
| 7. Supplementary Figure 7 .....   | Page 8  |
| 8. Supplementary Figure 8 .....   | Page 9  |
| 9. Supplementary Figure 9 .....   | Page 10 |
| 10. Supplementary Figure 10 ..... | Page 11 |
| 11. Supplementary Figure 11 ..... | Page 12 |
| 12. Supplementary Figure 12 ..... | Page 13 |
| 13. Supplementary Figure 13 ..... | Page 14 |
| 14. Supplementary Figure 14 ..... | Page 15 |
| 15. Supplementary Table 1 .....   | Page 16 |
| 16. Supplementary Table 2 .....   | Page 17 |
| 17. Supplementary Methods .....   | Page 18 |
| 18. References .....              | Page 19 |

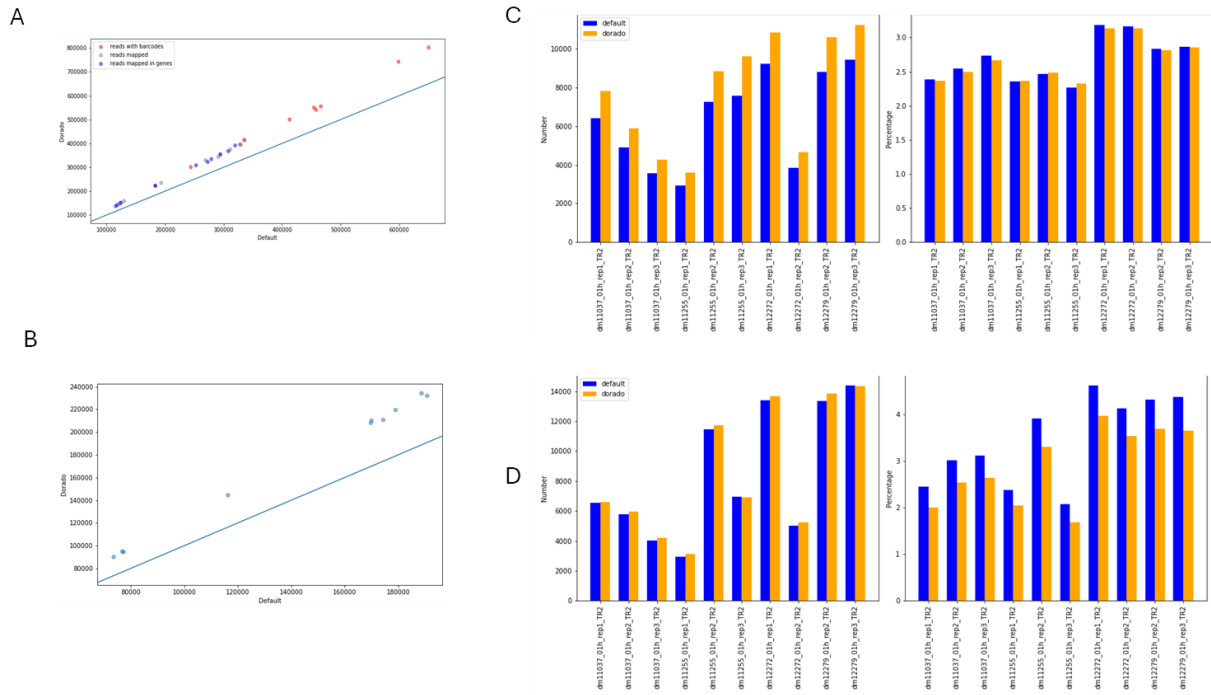

**Supplementary Figure 1:** Comparison of Guppy (default) and Dorado basecalling for technical replicate 2. A) Number of reads with assignable barcodes (red), number of mapped reads (grey) and number of reads mapped in genes (blue) in Dorado vs Guppy. B) Number of reads >2kb in Dorado vs Guppy C) Number and percentage of reads with evidence of intrapriming in Dorado and Guppy D) Number and percentage of reads with non-canonical junctions in Dorado and Guppy.

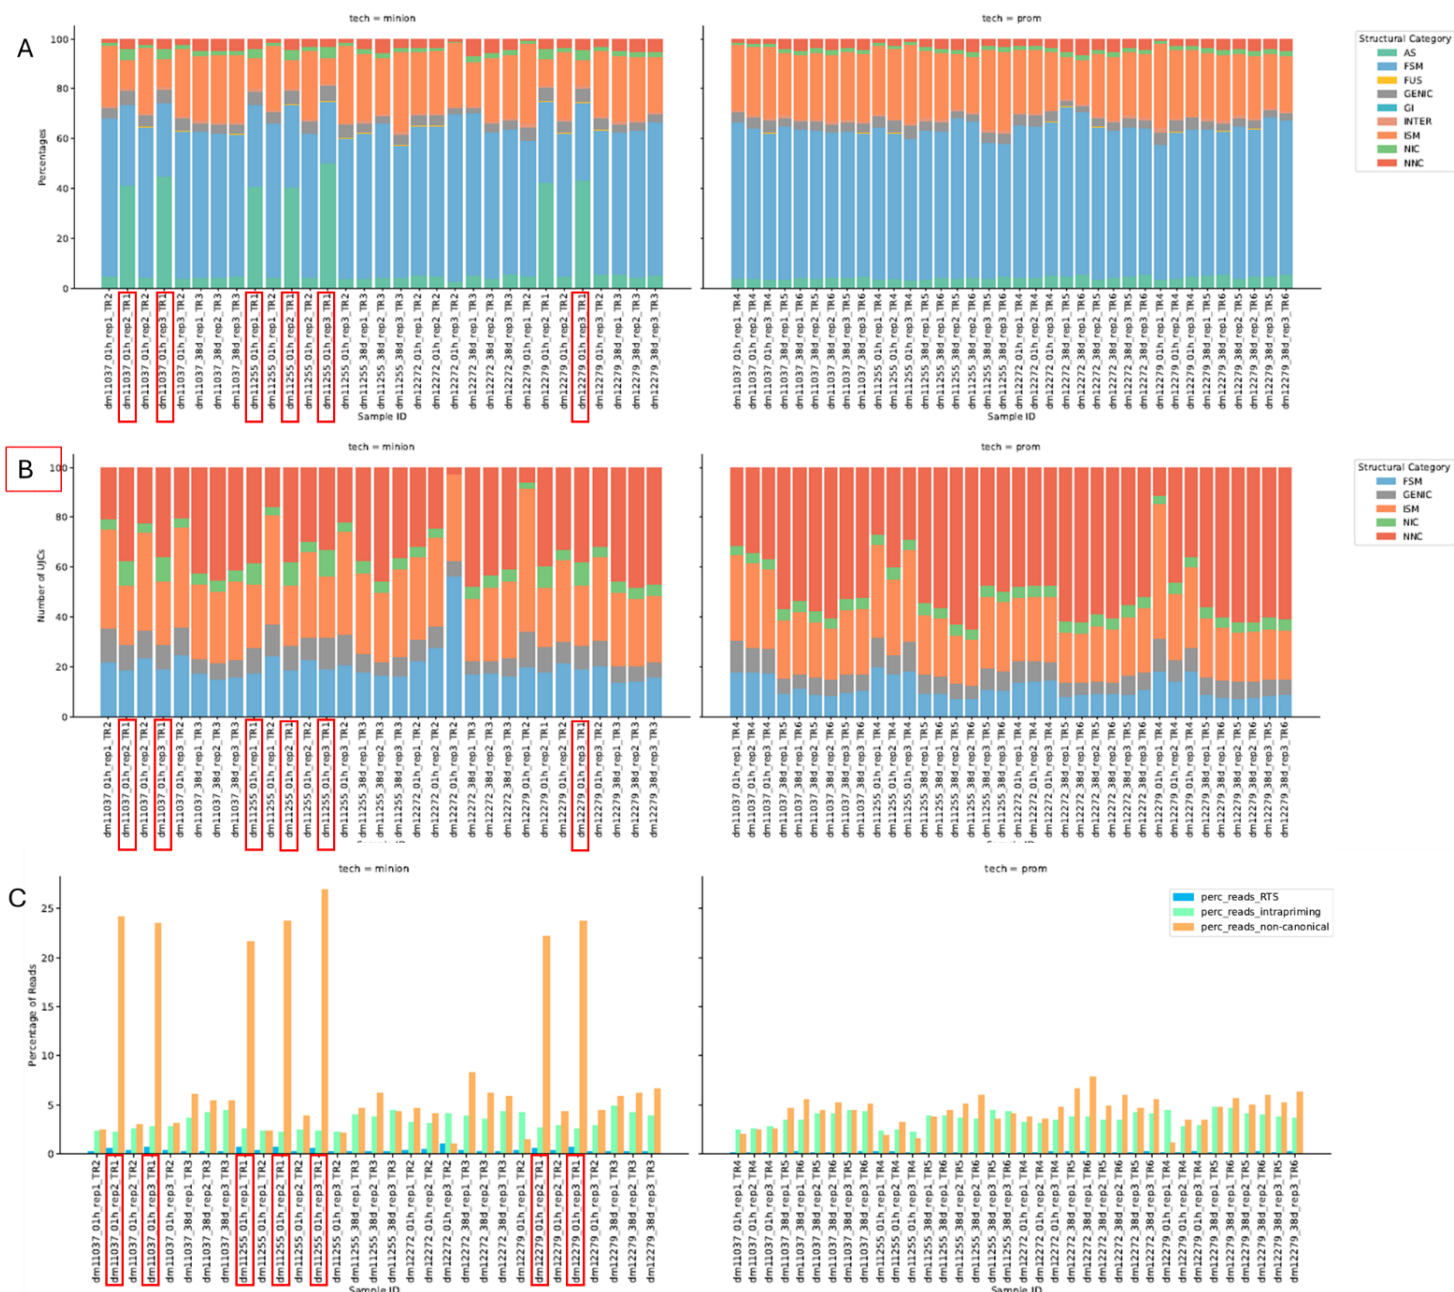

**Supplementary Figure 2: *Drosophila* technical replicates basecalled with Dorado.** A) Proportion of reads in each structural category. B) Proportion of unique junction chains (UJCs) across each structural category. C) Proportion of reads with evidence of RT-switching (blue), intraprimering (green) and non-canonical junctions (orange). Samples from technical replicate 1 are highlighted with red boxes.

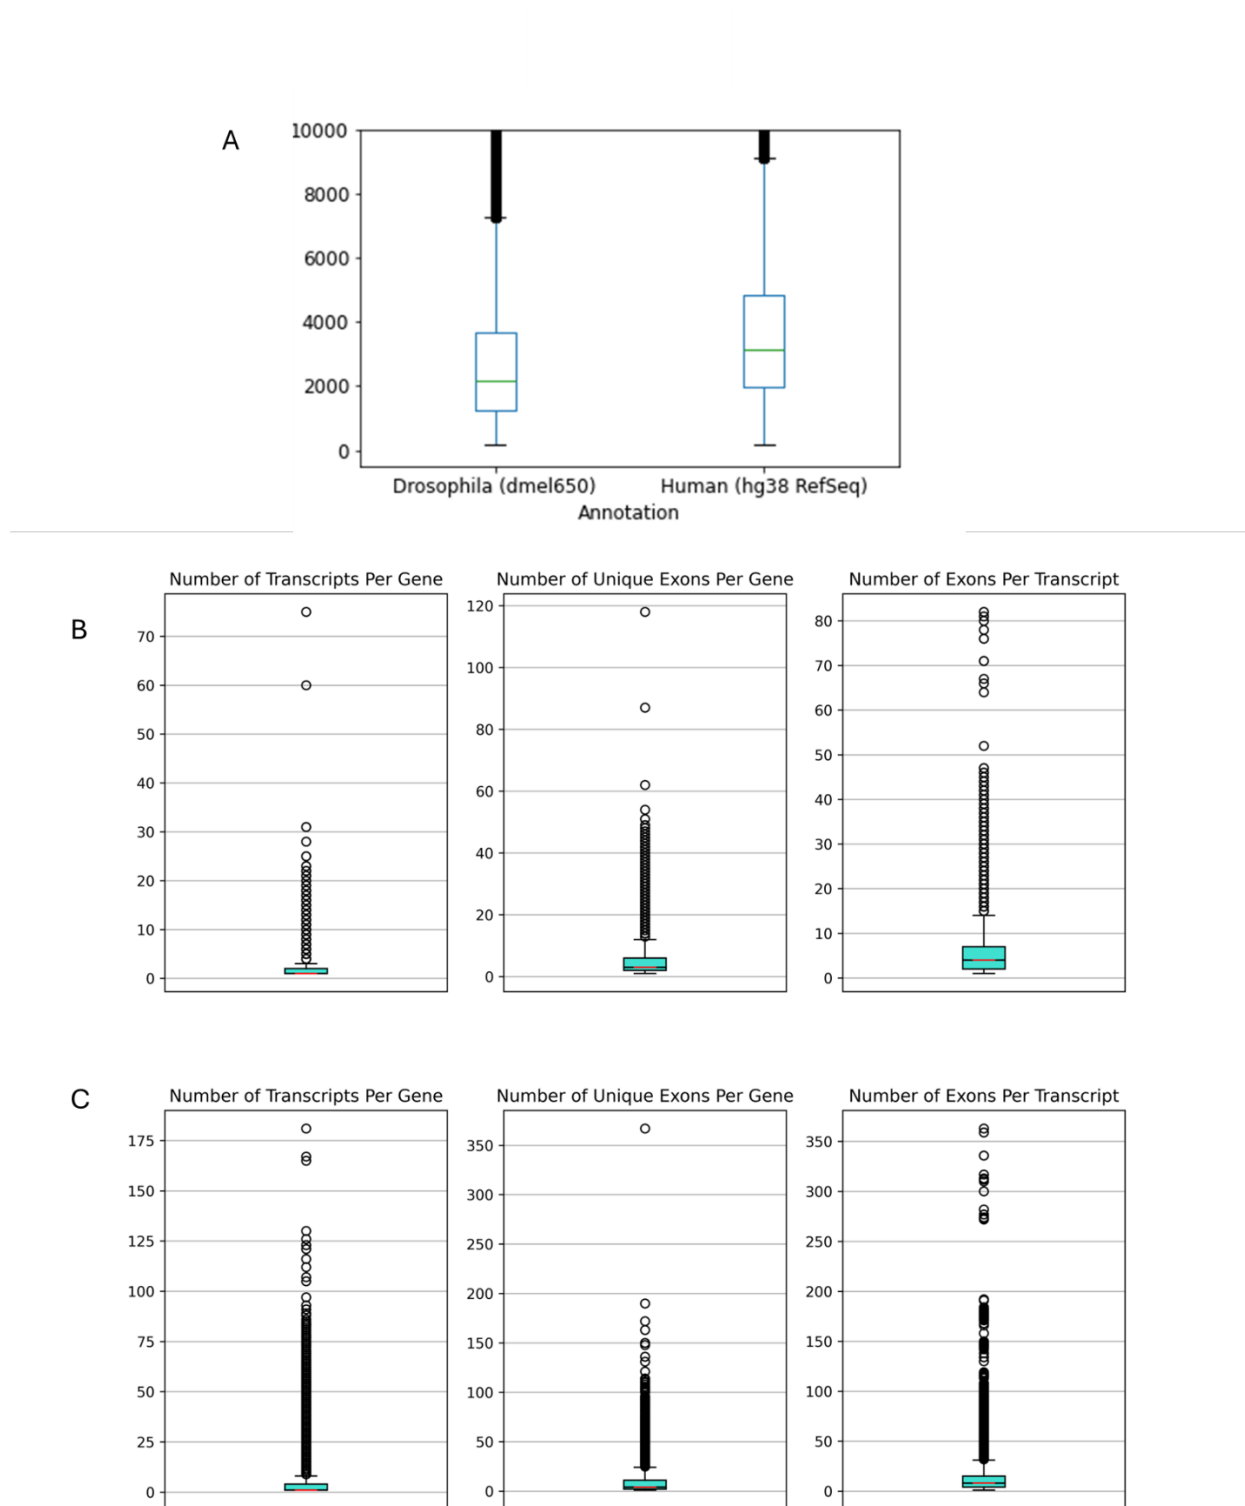

**Supplementary Figure 3: Complexity Metrics of Drosophila (dmel650) and Human (hg38 Refseq) Annotations.** A) Distribution of protein-coding transcript lengths in dmel650 and hg38 Refseq. B) Transcriptome Complexity Metrics for dmel650 C) Transcriptome complexity metrics for hg38 Refseq

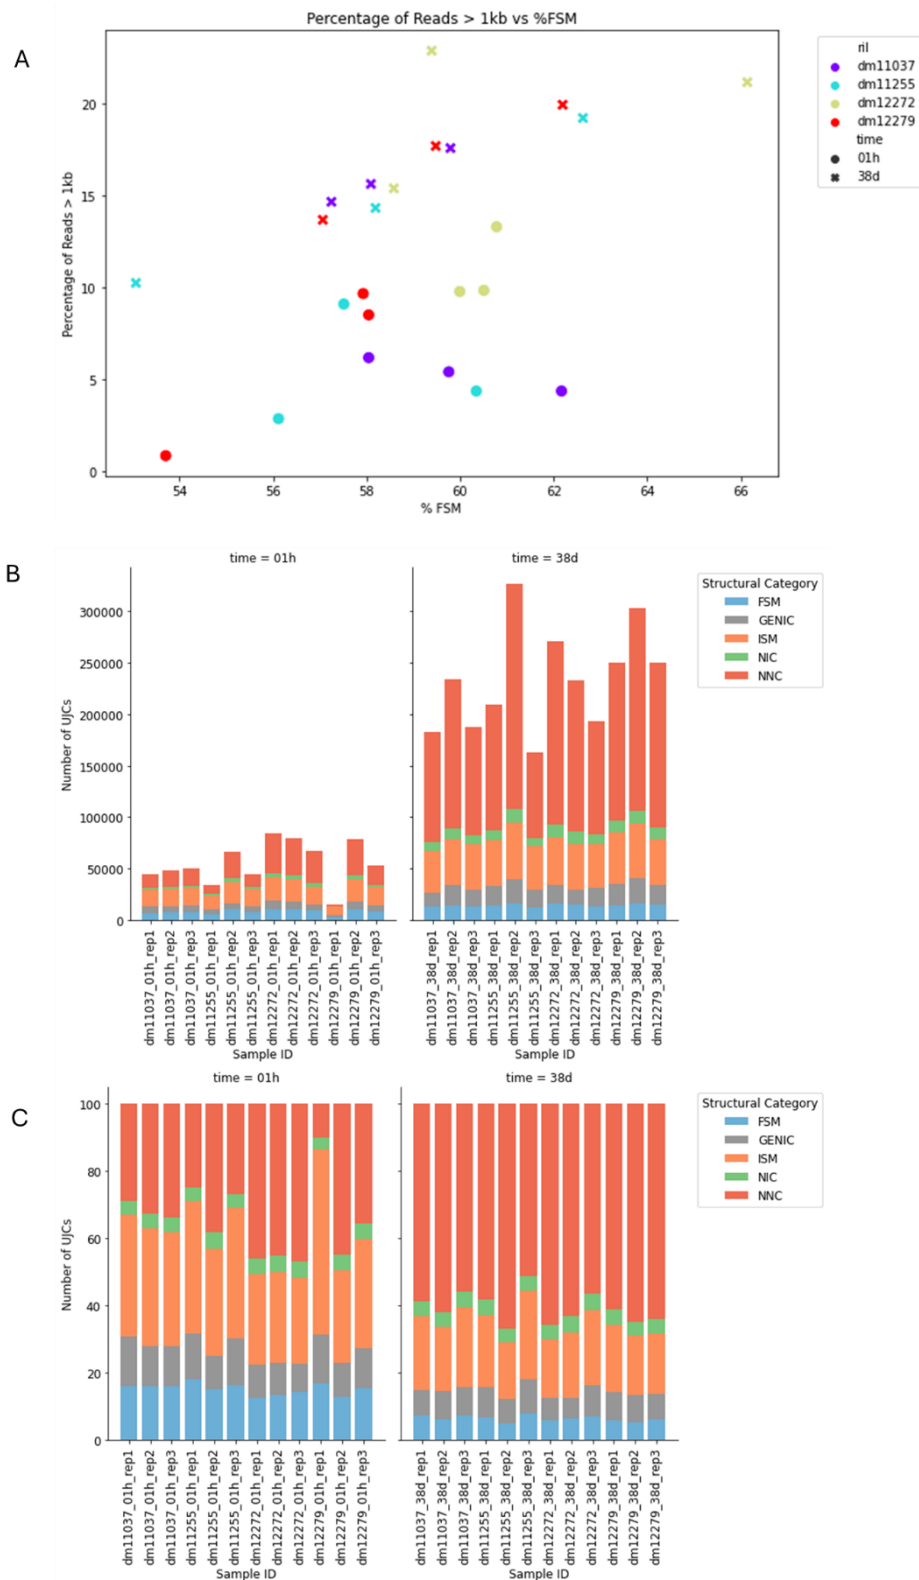

**Supplementary Figure 4: SQANTI-reads plots for *Drosophila* samples basecalled with Dorado**  
A) Percentage of reads greater than 1kb vs Percentage of reads classified as full-splice match (FSM) B) Number of UJCs detected coloured by structural category of the UJC. C) Proportion of UJCs coloured by structural category of the UJC

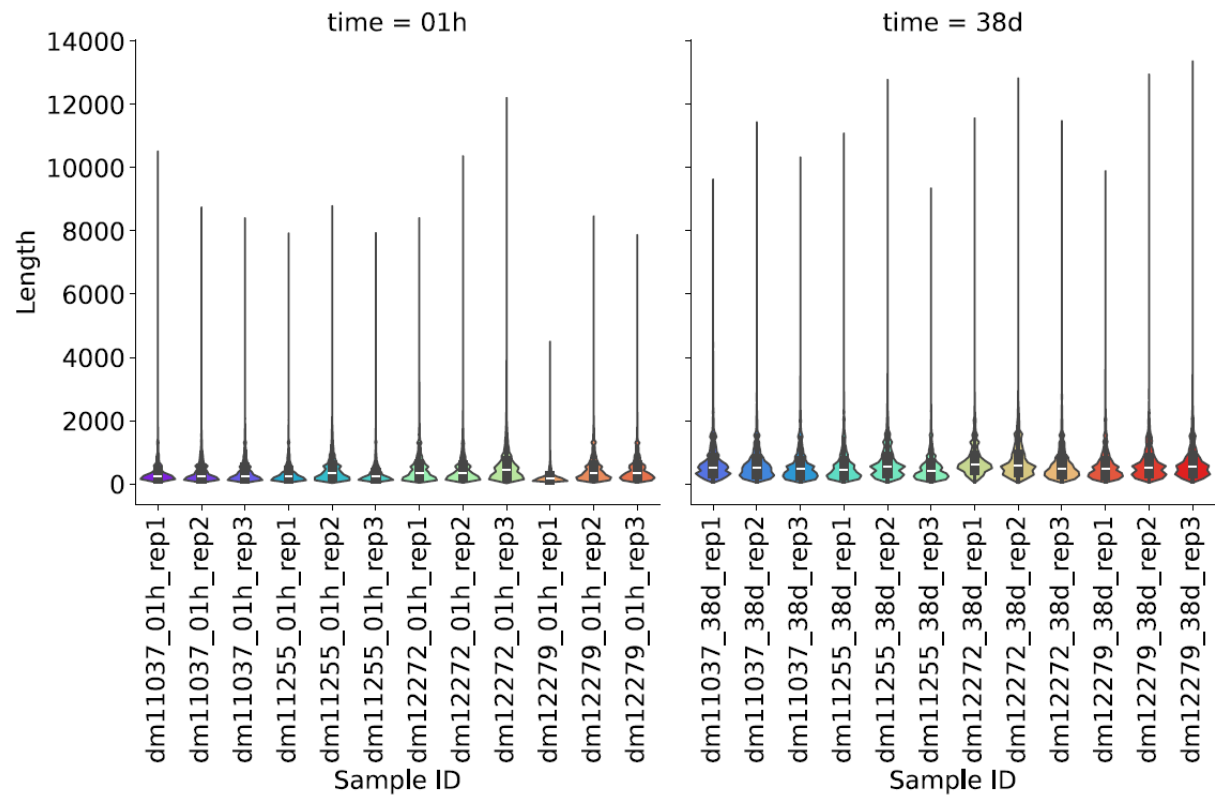

**Supplementary Figure 5:** SQANTI-reads violin plots of read length for *Drosophila* samples

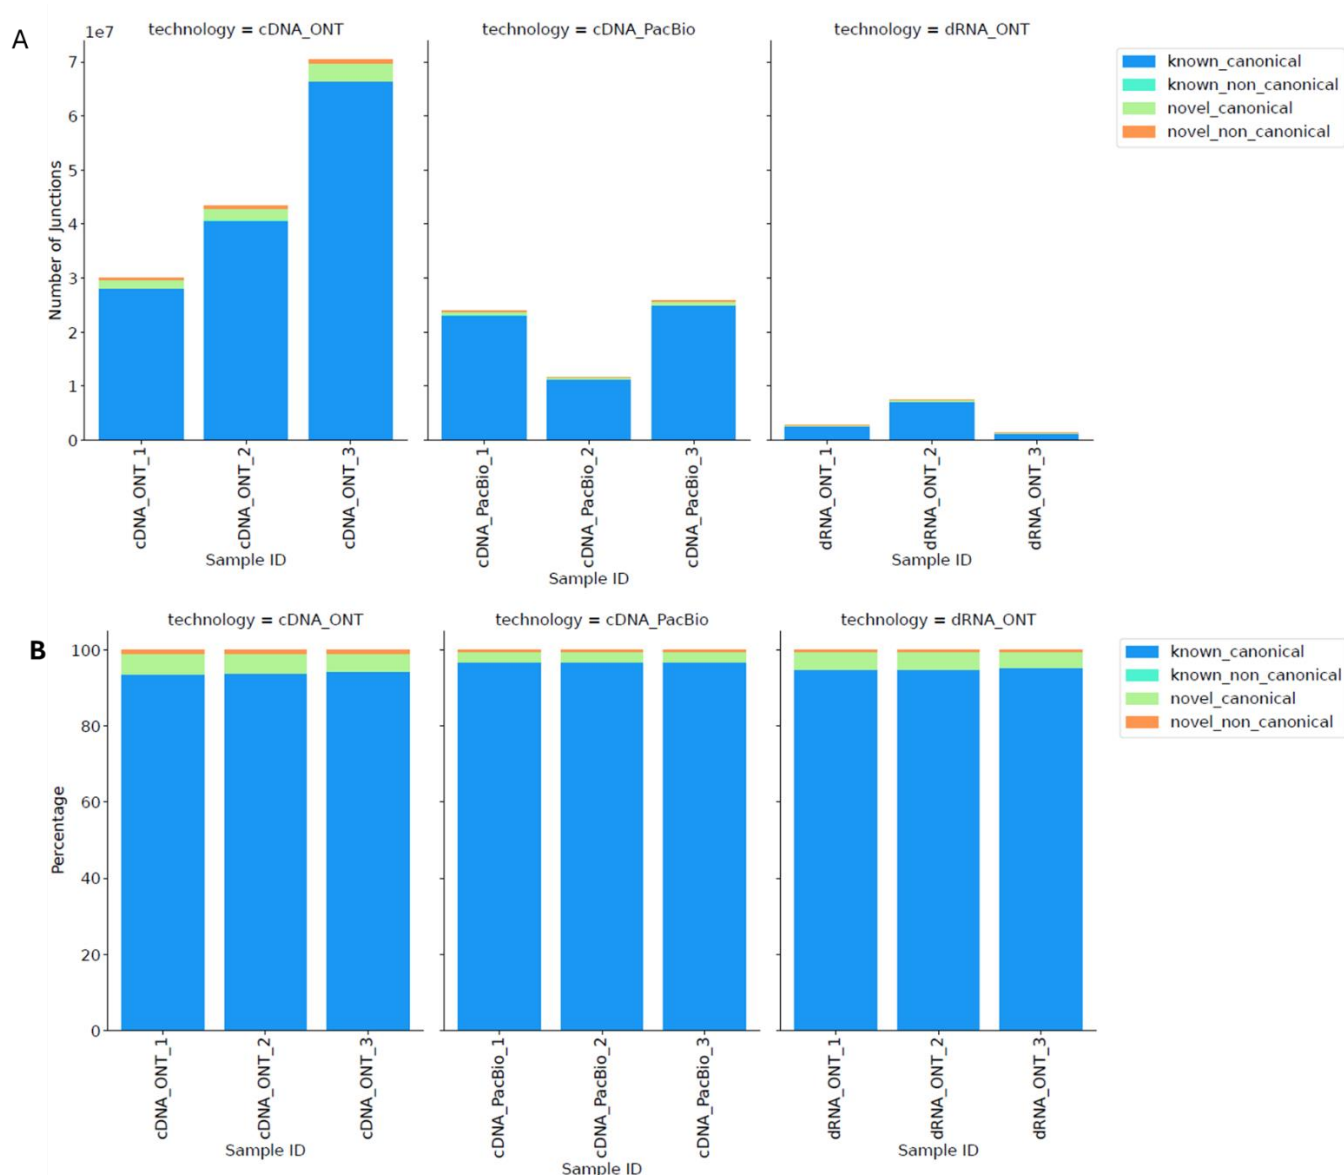

**Supplementary Figure 6:** Junction plots for WTC11 samples A) Number of junctions in reads coloured by junction categories (known-canonical, known-non-canonical, novel-canonical and novel-non-canonical) B) Proportion of junctions in reads in each junction category

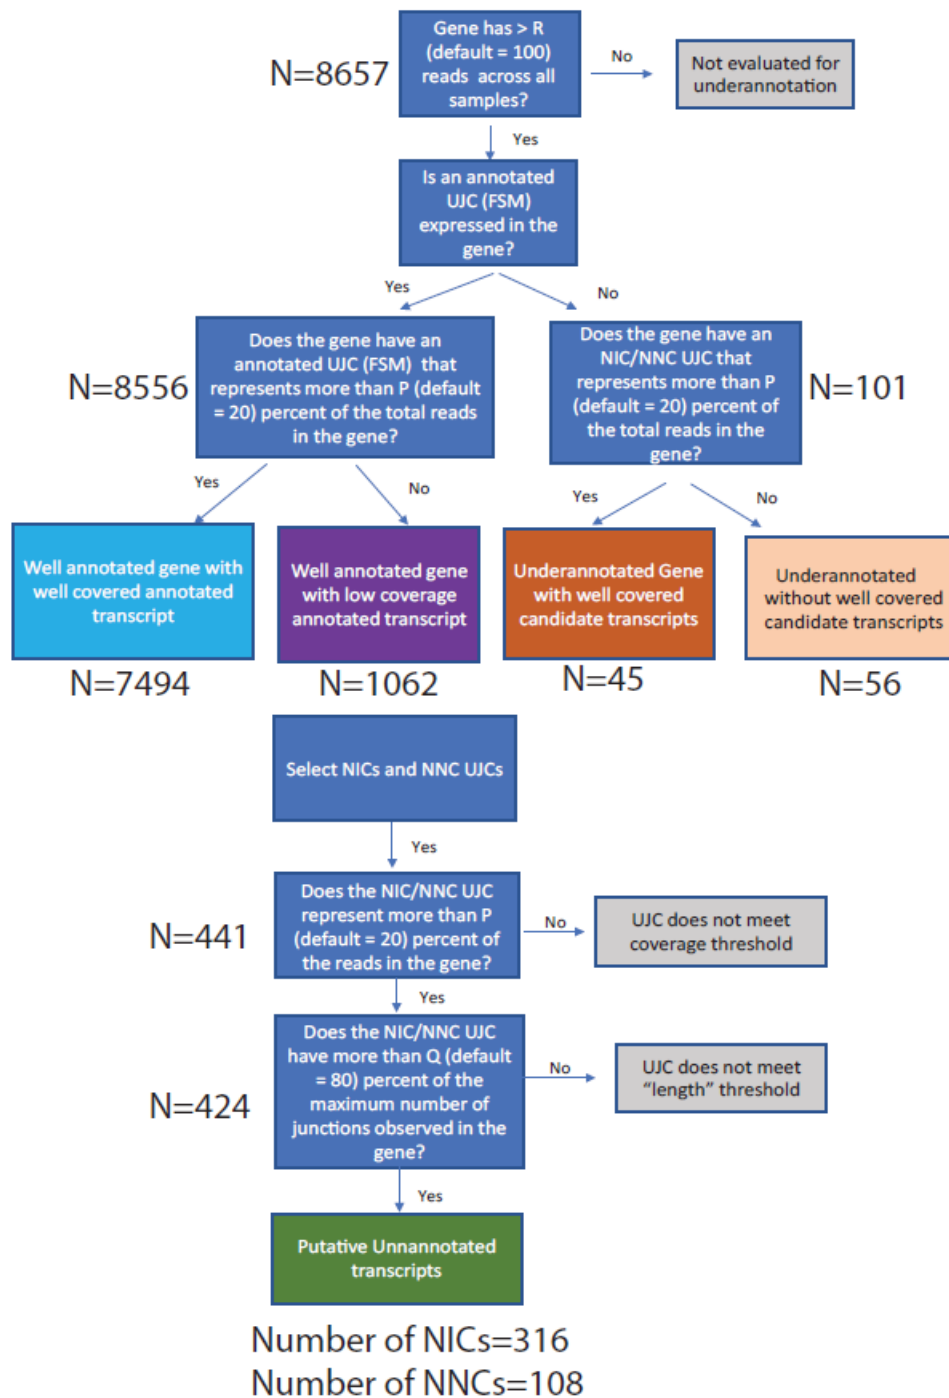

**Supplementary Figure 7:** Decision tree for classifying genes as well annotated or under-annotated and classifying transcripts as putative novel candidate transcripts annotated with the number of genes/transcripts classified at each step.



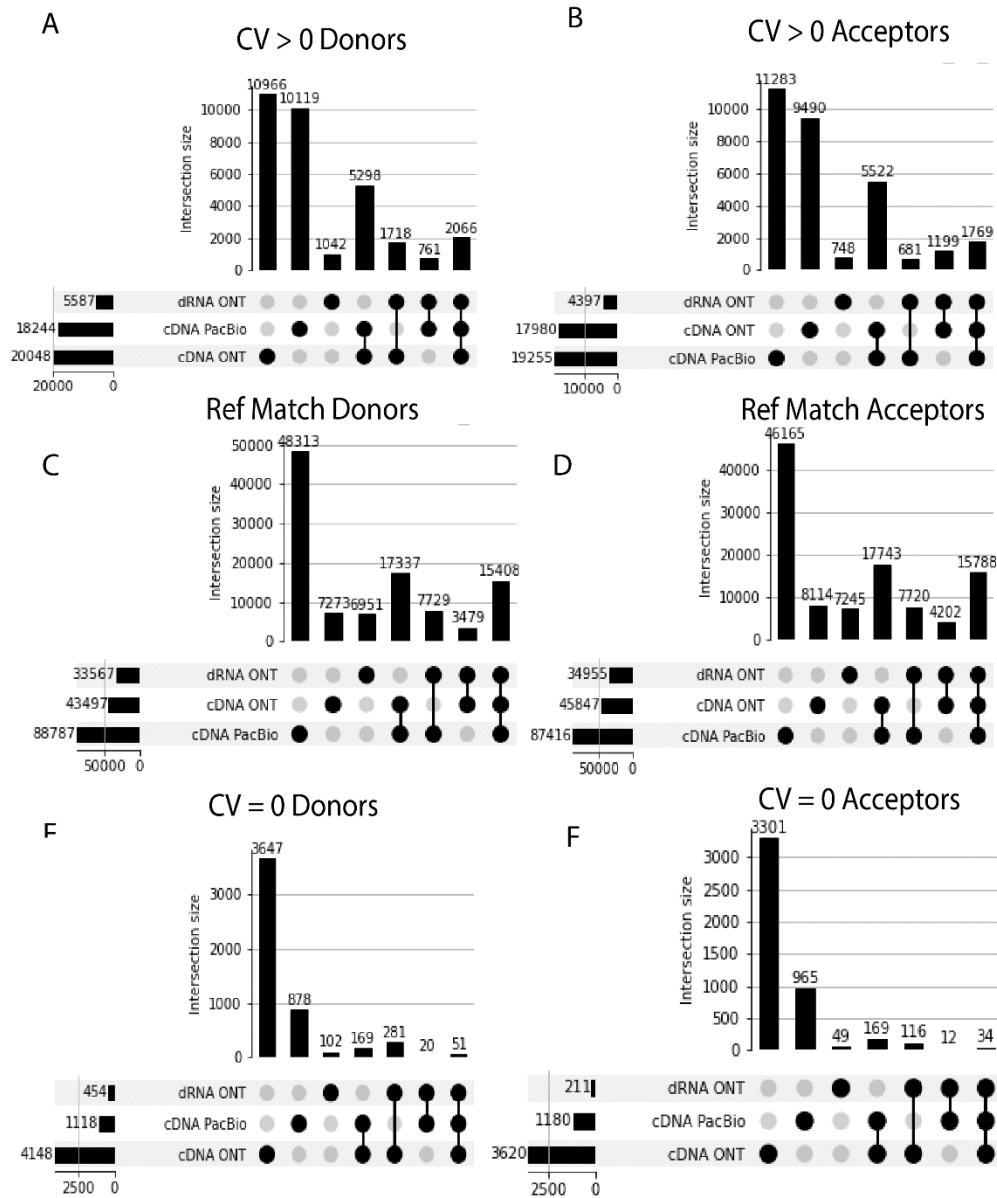

**Supplementary Figure 8:** Upset plot of donors and acceptors detected in replicate 1 of the WTC11 samples of each technology by variation category. CV > 0 donors (A) and acceptors (B) . Reference match donors (C) and acceptors (D). CV = 0 donors (E) and acceptors (F)

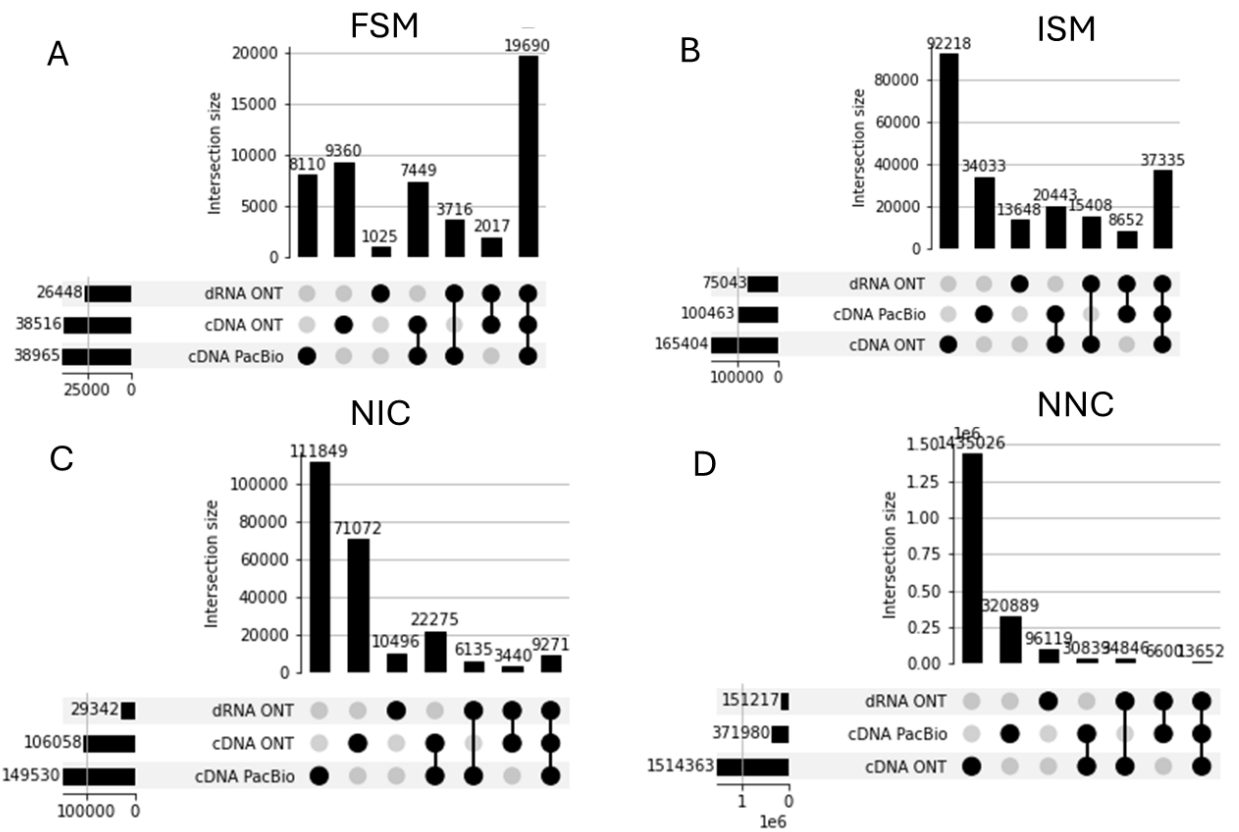

**Supplementary Figure 9:** Upset plot of multi-exon UJCs detected in each technology by structural category in the WTC11 samples. A) FSM UJCs B) ISM UJCs C) NIC UJCs and D) NNC UJCs

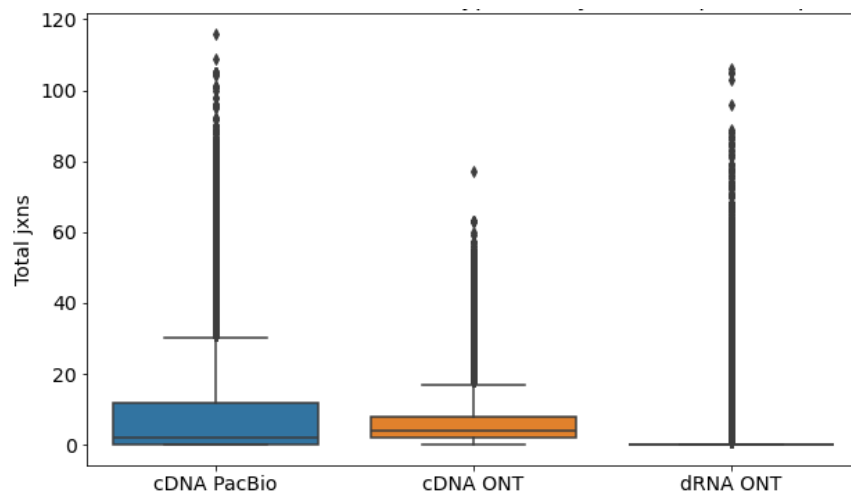

**Supplementary Figure 10:** Distribution of number of junctions in FSM UJCs detected exclusively in one technology for the WTC11 samples

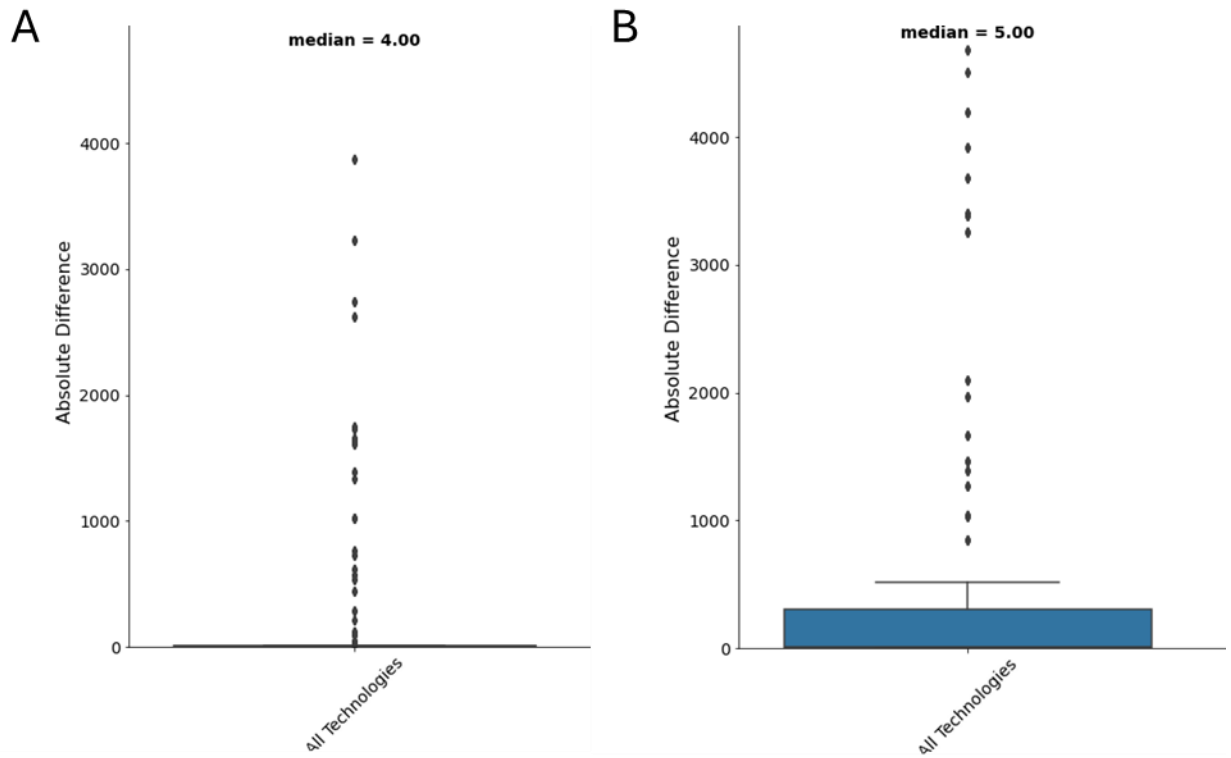

**Supplementary Figure 11:** For donors (A) and acceptors (B) with  $cv=0$  in replicate 1 of the WTC11 samples, boxplot of the distribution of the distance of the read donors and acceptors to the annotated donors and acceptors in replicate 1.

A

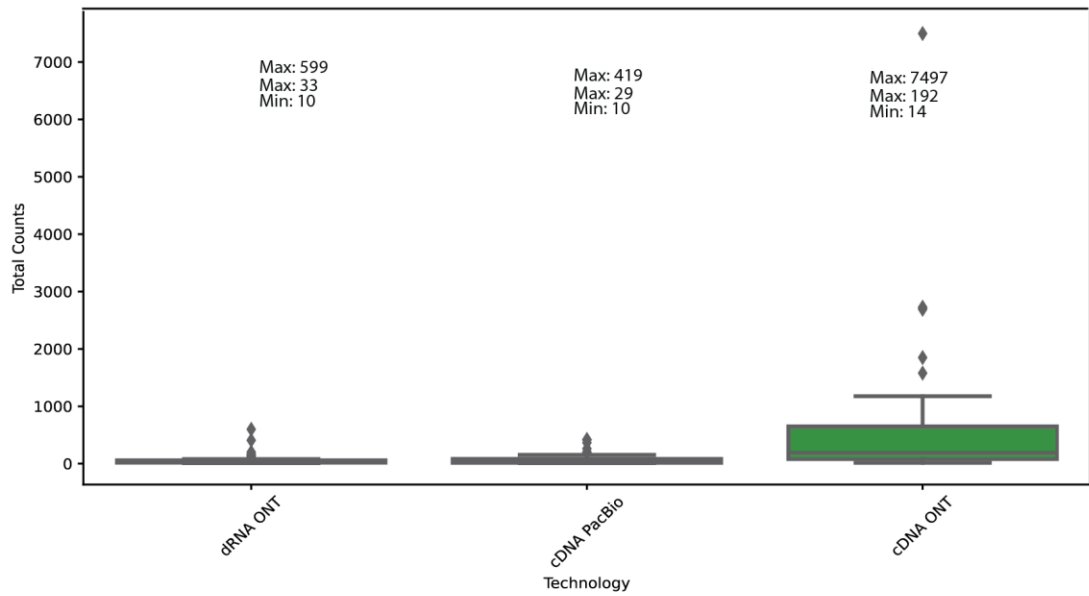

B

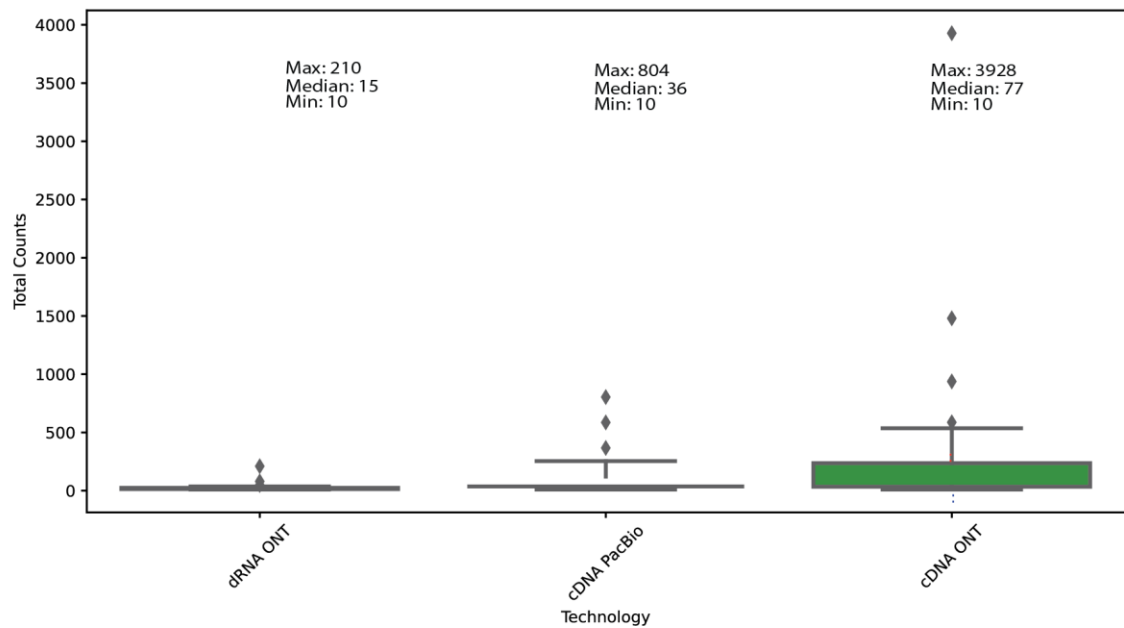

**Supplementary Figure 12:** For donors (A) and acceptors (B) with  $cv=0$  in replicate 1 of the WTC11 samples, boxplot of the number of reads associated with the reference junction with  $cv=0$ .

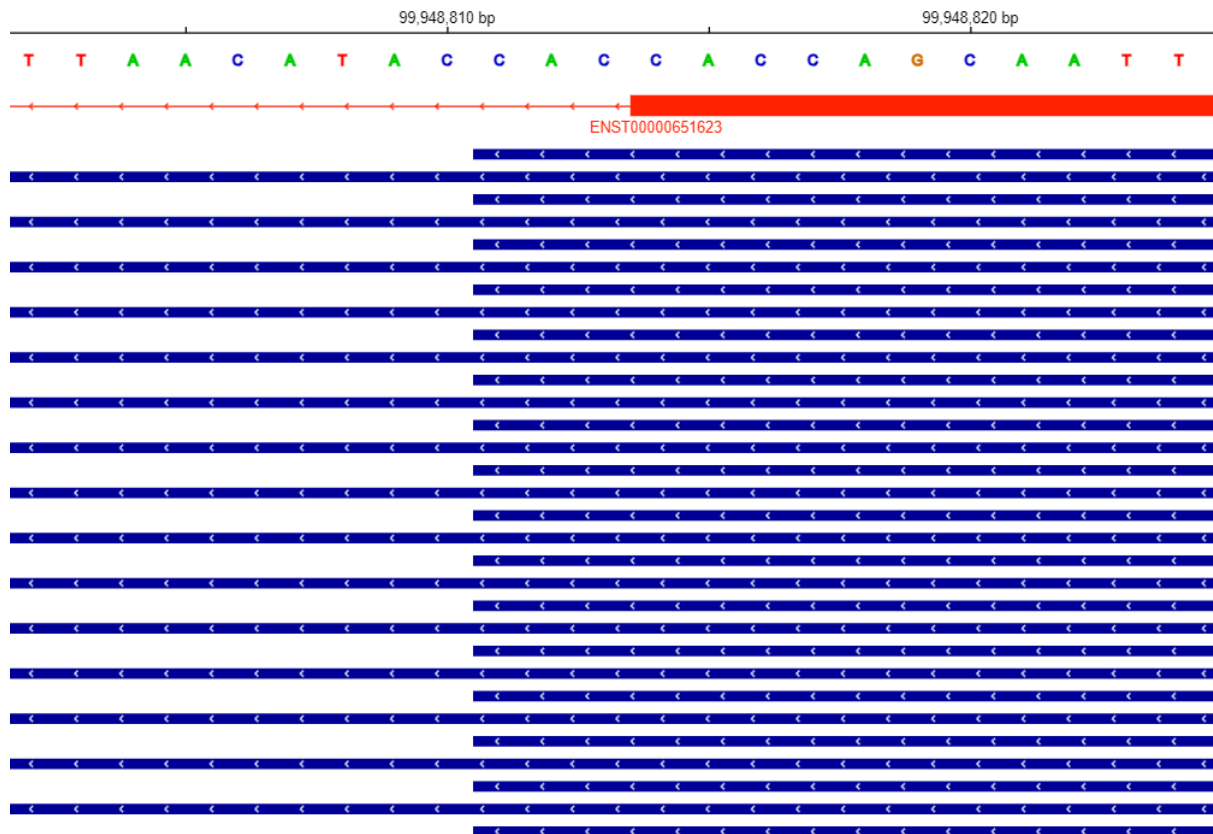

**Supplementary Figure 13:** IGV visualization of a reference donor with CV = 0 in the H2AZ1 gene at position 99,948,814 on Chromosome 4. All of the reads associated with this donor map to position 99,948,811 which is 3 nts away from the annotated donor position. The annotated transcript is shown in red and the reads are shown in blue.

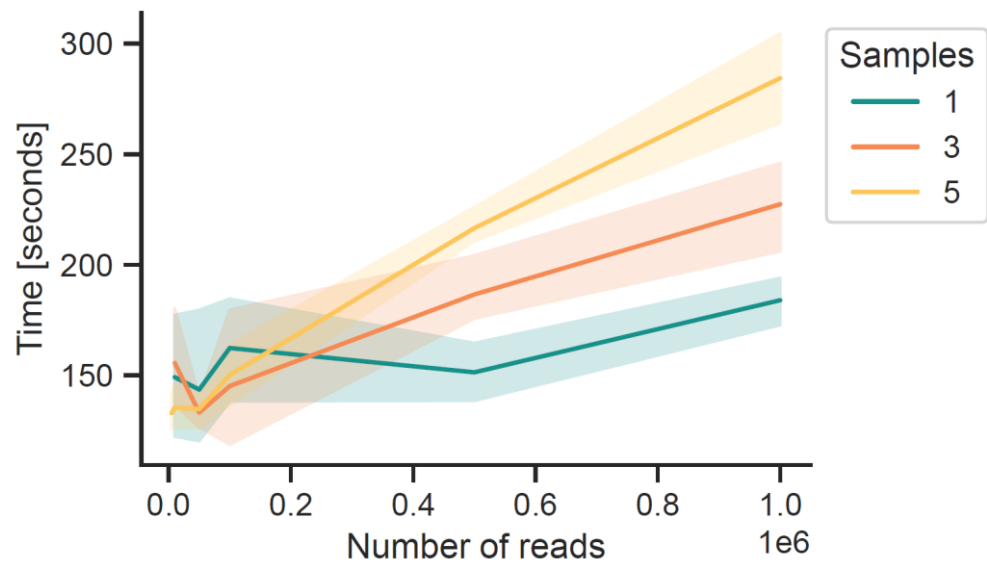

**Supplementary Figure 14:** Computational time for running SQANTI-reads with 1 (green), 3 (orange) and 5 (samples)

**Supplementary Table 1: Metadata for Drosophila Experiment**

| Sample | Biological Replicate | Genotype | Stage | Number of Technical Replicates | Minion Runs | Promethion Runs |
|--------|----------------------|----------|-------|--------------------------------|-------------|-----------------|
| S1     | 1                    | dm11037  | 01h   | 2                              | 1           | 1               |
| S1     | 2                    | dm11037  | 01h   | 3                              | 2           | 1               |
| S1     | 3                    | dm11037  | 01h   | 3                              | 2           | 1               |
| S2     | 2                    | dm11255  | 01h   | 3                              | 2           | 1               |
| S2     | 2                    | dm11255  | 01h   | 3                              | 2           | 1               |
| S2     | 3                    | dm11255  | 01h   | 3                              | 2           | 1               |
| S3     | 1                    | dm12272  | 01h   | 2                              | 1           | 1               |
| S3     | 2                    | dm12272  | 01h   | 2                              | 1           | 1               |
| S3     | 3                    | dm12272  | 01h   | 2                              | 1           | 1               |
| S4     | 1                    | dm12279  | 01h   | 2                              | 1           | 1               |
| S4     | 2                    | dm12279  | 01h   | 3                              | 2           | 1               |
| S4     | 3                    | dm12279  | 01h   | 3                              | 2           | 1               |
| S5     | 1                    | dn11037  | 38d   | 3                              | 1           | 2               |
| S5     | 2                    | dn11037  | 38d   | 3                              | 1           | 2               |
| S5     | 3                    | dm11037  | 38d   | 3                              | 1           | 2               |
| S6     | 1                    | dm11255  | 38d   | 3                              | 1           | 2               |
| S6     | 2                    | dm11255  | 38d   | 3                              | 1           | 2               |
| S6     | 3                    | dm11255  | 38d   | 3                              | 1           | 2               |
| S7     | 1                    | dm12272  | 38d   | 3                              | 1           | 2               |
| S7     | 2                    | dm12272  | 38d   | 3                              | 1           | 2               |
| S7     | 3                    | dm12272  | 38d   | 3                              | 1           | 2               |
| S8     | 1                    | dm12279  | 38d   | 3                              | 1           | 2               |
| S8     | 2                    | dm12279  | 38d   | 3                              | 1           | 2               |
| S8     | 3                    | dm12279  | 38d   | 3                              | 1           | 2               |



**Supplementary Table 2:** Metadata for WTC11 experiment

| Sample | Library Prep | Platform | Run Accession | Rep | BioSample   | File Accession              |
|--------|--------------|----------|---------------|-----|-------------|-----------------------------|
| WTC11  | dRNA         | ONT      | ENCSR392BGY   | 1   | ENCBS944CBA | <a href="#">ENCFF155CFF</a> |
| WTC11  | dRNA         | ONT      | ENCSR392BGY   | 2   | ENCBS593PKA | <a href="#">ENCFF771DIX</a> |
| WTC11  | dRNA         | ONT      | ENCSR392BGY   | 3   | ENCBS474NOC | <a href="#">ENCFF600LIU</a> |
| WTC11  | cDNA         | PacBio   | ENCSR507JOF   | 1   | ENCBS944CBA | <a href="#">ENCFF563QZR</a> |
| WTC11  | cDNA         | PacBio   | ENCSR507JOF   | 2   | ENCBS593PKA | <a href="#">ENCFF370NFS</a> |
| WTC11  | cDNA         | PacBio   | ENCSR507JOF   | 3   | ENCBS474NOC | <a href="#">ENCFF245IPA</a> |
| WTC11  | cDNA         | ONT      | ENCSR539ZXJ   | 1   | ENCBS944CBA | <a href="#">ENCFF263YFG</a> |
| WTC11  | cDNA         | ONT      | ENCSR539ZXJ   | 2   | ENCBS593PKA | <a href="#">ENCFF023EXJ</a> |
| WTC11  | cDNA         | ONT      | ENCSR539ZXJ   | 3   | ENCBS474NOC | <a href="#">ENCFF961HLO</a> |

## Supplementary Methods

### Comparing Putative Novel Transcripts with Annotated Transcripts

SQANTI-reads was run on all the WTC11 samples using the option `–factor-level` cDNA PacBio which allowed us to evaluate under-annotation on the cDNA PacBio samples only. Using the `ujc_counts.csv` and `putative_novel_transcripts.csv` out of SQANTI-reads, we created a list of all putative novel transcripts (conditions in Figure 3A) and the most expressed annotated (FSM) UJC in the same gene. We ran `idUJC.py` (Nanni et al. 2024) on all the WTC11 cDNA PacBio samples to generate GTF files of the representative UJCs in each WTC11 cDNA PacBio sample. From the UJC GTF files we created one GTF containing only putative novel transcripts and one GTF containing the most expressed annotated (FSM) UJC in the corresponding gene. We then ran `TranD` (Nanni et al. 2024) in two GTF mode to calculate the nucleotide difference metrics between each putative novel transcript and its corresponding most expressed annotated (FSM) UJC. This process was done separately for genes with a well covered FSM transcript (FSM > 20% of total gene coverage) (Figure 3D) and genes with a low coverage FSM (FSM ≤ 20% of the total gene coverage) (Figure 3E).

## References

Nanni A, Titus-McQuillan J, Bankole KS, Pardo-Palacios F, Signor S, Vlaho S, Moskalenko O, Morse Alison M, Rogers RL, Conesa A et al. 2024. Nucleotide-level distance metrics to quantify alternative splicing implemented in TranD. *Nucleic Acids Research* 52: e28-e28.
